# Supplementary material for: Effects of activity, genetic selection, and their interaction on muscle metabolic capacities and organ masses in mice
Source: Oxford University Press journal article supplement (doi:10.1242/jeb.148759), 2017-01-01
Supplement: jeb148759supp.pdf [file jeb148759supp.pdf]

## SUPPLEMENTARY MATERIAL

**Table S1.** Least-squares means and standard errors from analyses of all mice as presented in Table 1.

| Trait                                 | High Runner Lines |       |        |       | Control Lines |       |        |       | Mini-Muscle |      |        |       |
|---------------------------------------|-------------------|-------|--------|-------|---------------|-------|--------|-------|-------------|------|--------|-------|
|                                       | Sedentary         |       | Active |       | Sedentary     |       | Active |       | Sedentary   |      | Active |       |
|                                       | Mean              | SE    | Mean   | SE    | Mean          | SE    | Mean   | SE    | Mean        | SE   | Mean   | SE    |
| log Body Mass (g)                     | 1.45              | 0.02  | 1.44   | 0.02  | 1.52          | 0.02  | 1.48   | 0.02  | 1.47        | 0.01 | 1.48   | 0.02  |
| log Body Mass <sup>a</sup> (g)        | 1.46              | 0.01  | 1.44   | 0.01  | 1.49          | 0.02  | 1.47   | 0.02  | 1.47        | 0.01 | 1.46   | 0.02  |
| log Snout Rump (mm)                   | 2.01              | 0.00  | 2.01   | 0.00  | 2.02          | 0.00  | 2.02   | 0.00  | 2.01        | 0.00 | 2.02   | 0.00  |
| BMI <sup>b</sup> (kg/m <sup>2</sup> ) | 2.70              | 0.08  | 2.59   | 0.09  | 3.00          | 0.10  | 2.81   | 0.10  | 2.81        | 0.05 | 2.74   | 0.10  |
| log Soleus (mg)                       | 0.97              | 0.02  | 0.98   | 0.02  | 0.97          | 0.02  | 0.96   | 0.02  | 0.90        | 0.01 | 1.04   | 0.02  |
| log Plantarus (mg)                    | 1.12              | 0.02  | 1.13   | 0.02  | 1.14          | 0.02  | 1.15   | 0.02  | 1.16        | 0.01 | 1.11   | 0.02  |
| log Gastroc (mg)                      | 1.87              | 0.01  | 1.87   | 0.01  | 1.88          | 0.01  | 1.89   | 0.01  | 2.07        | 0.01 | 1.68   | 0.02  |
| log Fat Pad (mg)                      | 2.73              | 0.06  | 2.64   | 0.07  | 2.66          | 0.08  | 2.58   | 0.08  | 2.60        | 0.04 | 2.71   | 0.08  |
| log Ventricle (mg)                    | 2.12              | 0.01  | 2.17   | 0.01  | 2.10          | 0.01  | 2.12   | 0.01  | 2.12        | 0.01 | 2.15   | 0.01  |
| log Spleen (mg)                       | 1.97              | 0.03  | 1.94   | 0.04  | 2.02          | 0.04  | 2.02   | 0.04  | 1.94        | 0.02 | 2.03   | 0.04  |
| log Liver (mg)                        | 3.18              | 0.01  | 3.20   | 0.01  | 3.20          | 0.01  | 3.19   | 0.01  | 3.17        | 0.01 | 3.21   | 0.01  |
| log Kidney (mg)                       | 2.63              | 0.01  | 2.67   | 0.02  | 2.64          | 0.02  | 2.66   | 0.02  | 2.63        | 0.01 | 2.68   | 0.02  |
| log Lungs (mg), wet                   | 2.35              | 0.01  | 2.36   | 0.02  | 2.31          | 0.02  | 2.34   | 0.02  | 2.32        | 0.01 | 2.36   | 0.02  |
| dry                                   | 1.65              | 0.01  | 1.66   | 0.01  | 1.62          | 0.02  | 1.63   | 0.02  | 1.62        | 0.01 | 1.66   | 0.02  |
| log Stomach (mg), wet                 | 2.53              | 0.01  | 2.53   | 0.01  | 2.55          | 0.01  | 2.54   | 0.01  | 2.52        | 0.01 | 2.55   | 0.01  |
| dry                                   | 1.83              | 0.01  | 1.83   | 0.01  | 1.85          | 0.01  | 1.85   | 0.01  | 1.82        | 0.01 | 1.85   | 0.01  |
| log Sm Intes (mg), wet                | 3.35              | 0.02  | 3.38   | 0.02  | 3.37          | 0.02  | 3.39   | 0.02  | 3.36        | 0.01 | 3.38   | 0.02  |
| dry                                   | 2.53              | 0.01  | 2.55   | 0.01  | 2.54          | 0.01  | 2.56   | 0.01  | 2.54        | 0.01 | 2.55   | 0.01  |
| log Sm Intes Lth (cm)                 | 1.68              | 0.01  | 1.71   | 0.01  | 1.68          | 0.01  | 1.70   | 0.01  | 1.68        | 0.01 | 1.71   | 0.01  |
| log Cecum (mg), wet                   | 2.41              | 0.02  | 2.35   | 0.02  | 2.41          | 0.03  | 2.41   | 0.02  | 2.37        | 0.01 | 2.42   | 0.03  |
| dry                                   | 1.64              | 0.03  | 1.59   | 0.03  | 1.59          | 0.04  | 1.62   | 0.03  | 1.58        | 0.02 | 1.65   | 0.04  |
| log Lg Intes (mg), wet                | 2.61              | 0.01  | 2.65   | 0.01  | 2.60          | 0.02  | 2.61   | 0.02  | 2.61        | 0.01 | 2.63   | 0.02  |
| dry                                   | 1.97              | 0.02  | 2.00   | 0.02  | 1.95          | 0.02  | 1.95   | 0.02  | 1.95        | 0.01 | 1.99   | 0.02  |
| log Lg Intes Lth (cm)                 | 0.98              | 0.01  | 1.00   | 0.01  | 0.96          | 0.01  | 0.95   | 0.01  | 0.98        | 0.01 | 0.97   | 0.01  |
| Hematocrit (%)                        | 0.45              | 0.00  | 0.47   | 0.00  | 0.45          | 0.01  | 0.45   | 0.01  | 0.45        | 0.00 | 0.45   | 0.01  |
| no mass                               | 0.45              | 0.00  | 0.47   | 0.00  | 0.44          | 0.01  | 0.45   | 0.01  | 0.45        | 0.00 | 0.45   | 0.01  |
| <i>Ventricle</i>                      |                   |       |        |       |               |       |        |       |             |      |        |       |
| Citrate Synthase                      | 300.45            | 10.13 | 311.65 | 10.93 | 272.95        | 13.19 | 291.89 | 12.19 | 302.05      | 5.38 | 286.43 | 13.21 |

|                      |        |       |        |       |        |       |        |       |        |      |        |       |
|----------------------|--------|-------|--------|-------|--------|-------|--------|-------|--------|------|--------|-------|
| no mass              | 296.27 | 10.08 | 306.43 | 10.76 | 282.85 | 12.18 | 294.04 | 12.54 | 301.42 | 5.63 | 288.38 | 13.71 |
| Myoglobin            | 5.56   | 0.11  | 5.52   | 0.12  | 5.14   | 0.14  | 5.20   | 0.13  | 5.50   | 0.06 | 5.21   | 0.14  |
| no mass              | 5.51   | 0.12  | 5.44   | 0.12  | 5.25   | 0.14  | 5.21   | 0.14  | 5.49   | 0.06 | 5.22   | 0.15  |
| <i>Gastrocnemius</i> |        |       |        |       |        |       |        |       |        |      |        |       |
| Citrate Synthase     | 87.35  | 6.60  | 113.27 | 6.82  | 79.46  | 8.25  | 86.47  | 7.76  | 70.93  | 3.52 | 112.34 | 8.05  |
| no mass              | 85.58  | 6.73  | 110.35 | 6.85  | 83.56  | 8.04  | 86.82  | 8.09  | 70.81  | 3.87 | 112.34 | 8.62  |
| Myoglobin            | 1.42   | 0.06  | 1.74   | 0.06  | 1.36   | 0.08  | 1.48   | 0.07  | 1.01   | 0.03 | 1.99   | 0.08  |
| no mass              | 1.41   | 0.06  | 1.72   | 0.06  | 1.39   | 0.07  | 1.49   | 0.07  | 1.01   | 0.03 | 1.99   | 0.08  |

<sup>a</sup>Snout–rump length as the covariate for analysis of body mass.

<sup>b</sup>BMI (kg/m<sup>2</sup>) is body mass index.

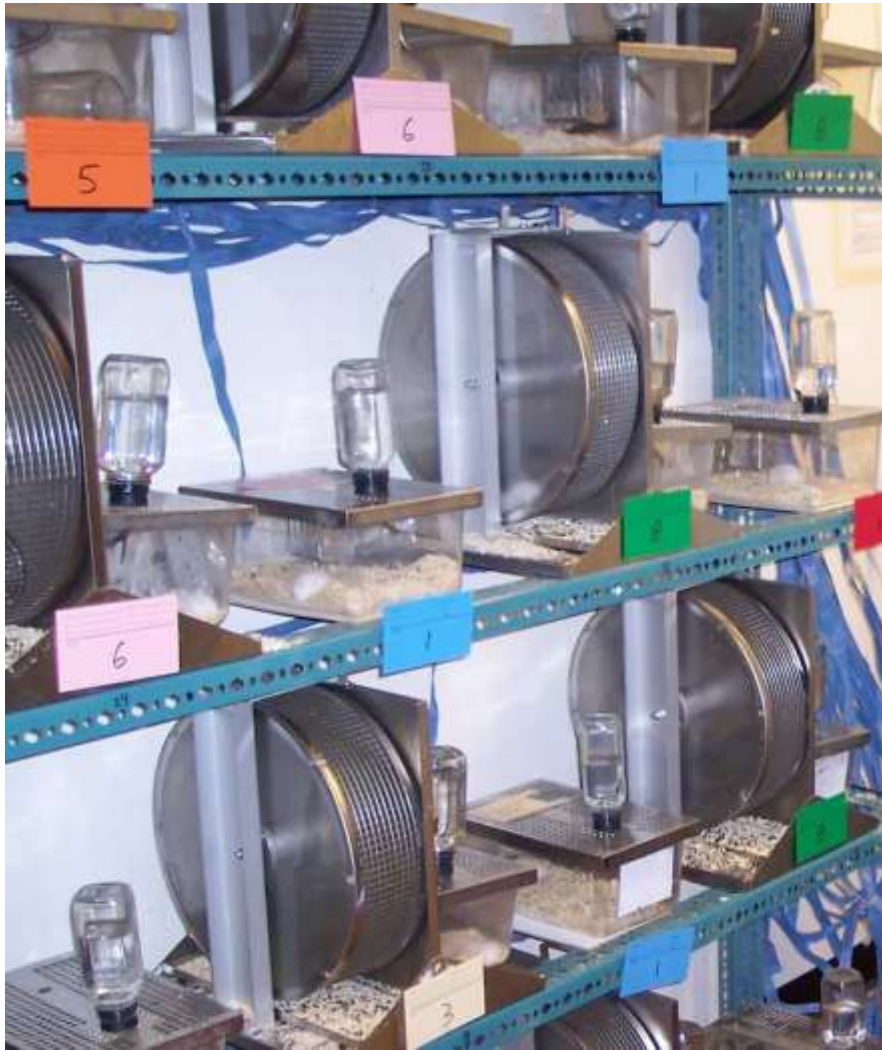

**Fig. S1. Cages with and without wheels placed alternately on racks.** Four groups were compared: mice from C lines housed without wheels (sedentary,  $N = 24$ ); mice from C lines housed with wheels (active,  $N = 24$ ); mice from HR lines housed without wheels (sedentary,  $N = 24$ ) and mice from HR lines housed with wheels (active,  $N = 24$ ).

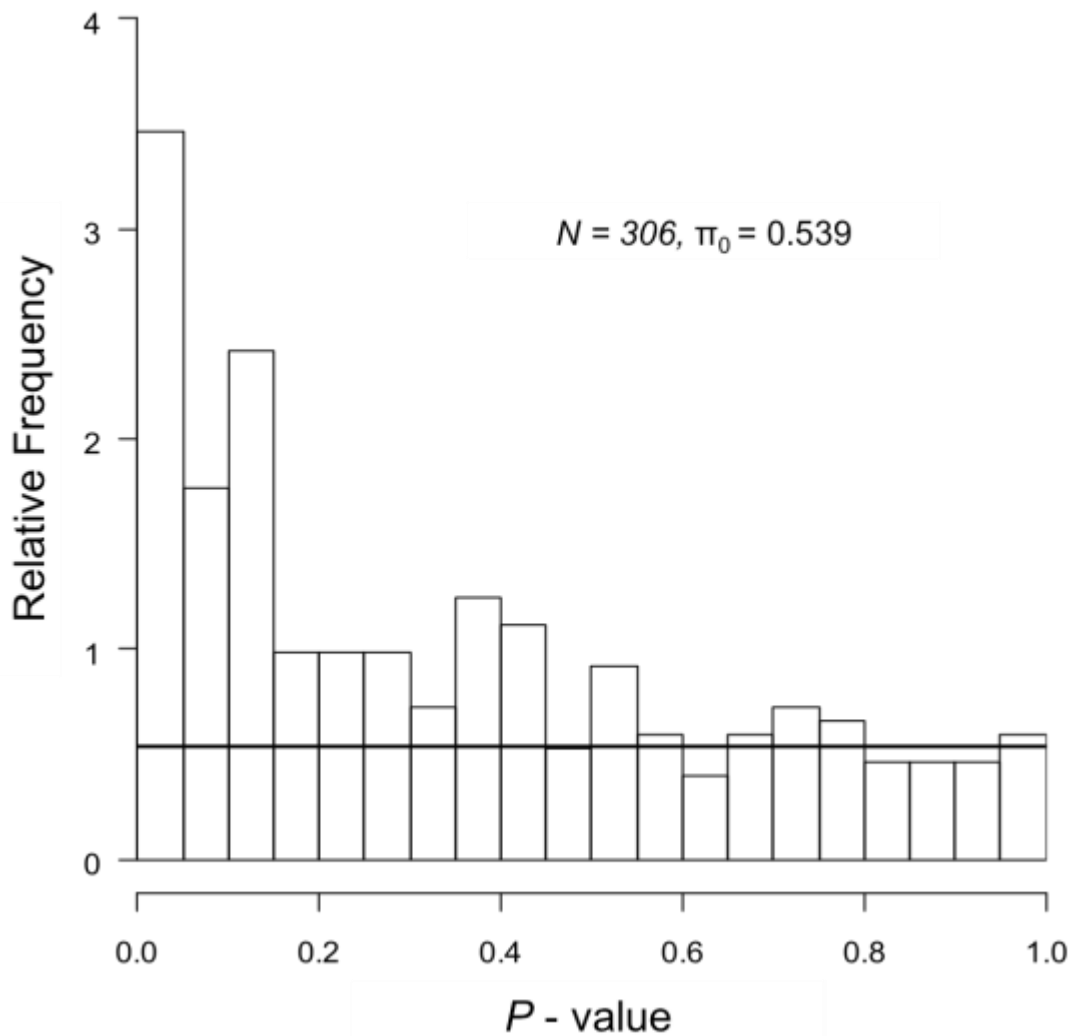

**Fig. S2. Distributions of  $P$  values in relation to the  $\pi_0$  statistic.** The overall proportion of true null hypotheses (Storey and Tibshirani, 2003; Storey, 2003) for a subset of the  $P$ -values in Tables 1-3 (see text). The bin size is 0.05;  $\pi_0$  is indicated by the solid line. A random set of  $P$ -values would produce a flat histogram with all bins showing a relative frequency of 1.0; the presence of non-null hypotheses (i.e., significant tests after accounting for Type 1 errors) are indicated by high relative frequencies in the left-most bin. Values of  $\pi_0$  were computed with the *qvalue* software package for R.
